# Supplementary material for: Alzheimer Disease Blood Biomarkers in Patients With Out-of-Hospital Cardiac Arrest
Source: PubMed Central journal article supplement (PMC9989959; doi:10.1001/jamaneurol.2023.0050), 2023-03-06
Supplement: jamaneurol-e230050-s001.pdf [file jamaneurol-e230050-s001.pdf]

## Supplemental Online Content

Ashton NJ, Moseby-Knappe M, Benedet AL, et al. Alzheimer disease blood biomarkers in patients with out-of-hospital cardiac arrest. *JAMA Neurol*. Published online March 6, 2023. doi:10.1001/jamaneurol.2023.0050

**eTable 1.** Demographic characteristic of the discovery cohort

**eTable 2.** Serum p-tau, A $\beta$ 40, A $\beta$ 42 and A $\beta$ 42/40 in out-of-hospital cardiac arrest with good and poor neurologic outcome (discovery cohort)

**eTable 3.** Summary statistics of the longitudinal analysis in the validation cohort

**eTable 4.** Biomarker fold changes at each time point in the validation cohort

**eTable 5.** Sensitivity analysis: serum p-tau, t-tau, NfL, A $\beta$ 40, A $\beta$ 42 and A $\beta$ 42/40 in cardiac arrest with good and poor outcome (validation cohort – complete cases)

**eTable 6.** Sensitivity analysis: summary statistics of the longitudinal analyses in the validation cohort on complete cases

**eTable 7.** Sensitivity analysis: biomarker fold changes at each time point in the validation cohort on complete cases

**eFigure 1.** Cross-sectional biomarker concentrations in the discovery cohort

**eFigure 2.** Biomarker changes over time in the discovery cohort

**eFigure 3.** Cross-sectional biomarker concentrations in the validation cohort

**eFigure 4.** Biomarker correlations in the validation cohort

**eFigure 5.** Biomarker change correlations in the validation cohort

**eFigure 6.** Sensitivity analysis: fold-changes of blood levels of p-tau, NfL, t-tau, A $\beta$ 40, A $\beta$ 42 and AB42/40

This supplemental material has been provided by the authors to give readers additional information about their work.

**eTable 1.** Demographic characteristic of the discovery cohort

|                     | Good outcome ( $\leq$ CPC2) |                     |                      | Poor outcome ( $\geq$ CPC3) |                       |                        |
|---------------------|-----------------------------|---------------------|----------------------|-----------------------------|-----------------------|------------------------|
|                     | All participants            | Low NfL (<35 pg/mL) | High NfL (>79 pg/mL) | All participants            | Low NfL (<4212 pg/mL) | High NfL (>4609 pg/mL) |
| <i>N</i>            | 40                          | 20                  | 20                   | 40                          | 20                    | 20                     |
| Age, years (SD)     | 58.8 (11.1)                 | 56.1 (12.1)         | 61.7 (12.5)          | 62.8 (12.9)                 | 63.9 (12.2)           | 61.3 (13.1)            |
| Sex, M%             | 83%                         | 85%                 | 80%                  | 90%                         | 85%                   | 95%                    |
| NfL (pg/mL) (Range) |                             | 20 (12 – 35)        | 195 (79 – 346)       |                             | 1823 (495 – 4212)     | 12348 (4609 – 26353)   |

NfL (< 35 pg/mL), good outcome and a mild increase in NfL (79-346 pg/mL), poor outcome and moderate increase in NfL (495-4212 pg/mL), and poor outcome and high NfL (4609-36353 pg/mL). NfL values at 72 h post cardiac arrest.

**eTable 2.** Serum p-tau, A $\beta$ 40, A $\beta$ 42 and A $\beta$ 42/40 in out-of-hospital cardiac arrest with good and poor neurologic outcome (discovery cohort)

|                           | Total AUROC<br>(95% CI) | <i>P</i> value | Good outcome      | Poor outcome      |
|---------------------------|-------------------------|----------------|-------------------|-------------------|
| 24 h after cardiac arrest |                         |                |                   |                   |
| p-tau181                  | 0.75 (63.7–88.1)        | < 0.001        | 6.33 (1–56)       | 17.0 (2.2–364)    |
| A $\beta$ 40              | 0.54 (0.41–0.67)        | Ns             | 71.4 (6.2–224)    | 55.2 (4.9–770)    |
| A $\beta$ 42              | 0.54 (0.40–0.67)        | Ns             | 6.6 (0.4–18.1)    | 6.5 (.7–80.5)     |
| A $\beta$ 42/40           | 0.53 (0.40–0.66)        | Ns             | 0.091 (0.04–0.63) | 0.089 (0.02–0.69) |
| 48 h after cardiac arrest |                         |                |                   |                   |
| p-tau181                  | 0.69 (59.1–82.1)        | 0.001          | 5.7 (1.5–70)      | 11.2 (2–156)      |
| A $\beta$ 40              | 0.68 (0.56–0.79)        | 0.007          | 87.3 (10.3–384)   | 132.7 (10.4–500)  |
| A $\beta$ 42              | 0.68 (0.56–0.80)        | 0.005          | 9.3 (1.2–33.5)    | 12.9 (1.2–44.9)   |
| A $\beta$ 42/40           | 0.62 (0.49–0.74)        | Ns             | 0.1 (0.02–0.37)   | 0.087 (0.05–0.27) |
| 72 h after cardiac arrest |                         |                |                   |                   |
| p-tau181                  | 0.62 (51.5–74.2)        | 0.022          | 4.9 (1.1–64)      | 9.2 (1.3–54)      |
| A $\beta$ 40              | 0.65 (0.52–0.77)        | 0.029          | 121.2 (31–299)    | 170.7 (15.4–825)  |
| A $\beta$ 42              | 0.65 (0.53–0.78)        | 0.019          | 11.3 (1.5–28)     | 13.6 (0.5–50.3)   |
| A $\beta$ 42/40           | 0.59 (0.46–0.71)        | Ns             | 0.091 (0.02–0.14) | 0.087 (0.02–0.15) |

Abbreviations: A $\beta$ 42, amyloid- $\beta$  42; A $\beta$ 40, amyloid- $\beta$  40; A $\beta$ 42/40, amyloid- $\beta$  42/40; AUROC, area under the receiver operating characteristic curve; CI, confidence interval; IQR, interquartile range; p-tau181, tau phosphorylated at threonine 181.

**eTable 3.** Summary statistics of the longitudinal analysis in the validation cohort

| Characteristic       | p-tau  |                  |         | NfL   |              |         | t-tau   |                 |         |
|----------------------|--------|------------------|---------|-------|--------------|---------|---------|-----------------|---------|
|                      | Beta   | 95% CI           | P-value | Beta  | 95% CI       | P-value | Beta    | 95% CI          | P-value |
| Outcome (poor)       | 0.891  | 0.831, 0.950     | <0.0001 | 1.269 | 1.171, 1.366 | <0.0001 | 0.452   | 0.320, 0.583    | <0.0001 |
| time                 | 0.0001 | - 0.0004, 0.0007 | 0.62    | 0.003 | 0.003, 0.004 | <0.0001 | - 0.006 | - 0.007, -0.004 | <0.0001 |
| Outcome(poor) * time | -0.011 | -0.012, -0.010   | <0.0001 | 0.004 | 0.004, 0.005 | <0.0001 | 0.016   | 0.015, 0.018    | <0.0001 |

| Characteristic        | A $\beta$ 40 |                |         | A $\beta$ 42 |                |         | A $\beta$ 42/40 |                   |         |
|-----------------------|--------------|----------------|---------|--------------|----------------|---------|-----------------|-------------------|---------|
|                       | Beta         | 95% CI         | P-value | Beta         | 95% CI         | P-value | Beta            | 95% CI            | P-value |
| Outcome (poor)        | -0.170       | -0.292, -0.048 | 0.006   | - 0.048      | - 0.127, 0.030 | 0.22    | 0.130           | 0.062, 0.198      | <0.0001 |
| time                  | 0.005        | 0.004, 0.006   | <0.0001 | 0.004        | 0.003, 0.004   | <0.0001 | - 0.0008        | - 0.001, 0.0000   | 0.054   |
| Outcome (poor) * time | 0.003        | 0.002, 0.005   | <0.0001 | 0.002        | 0.001, 0.003   | <0.0001 | -0.001          | - 0.002, - 0.0003 | 0.016   |

Abbreviations: A $\beta$ 42, amyloid- $\beta$  42; A $\beta$ 40, amyloid- $\beta$  40; A $\beta$ 42/40, amyloid- $\beta$  42/40; CI, confidence interval; NfL, neurofilament light chain; p-tau181, tau phosphorylated at threonine 181; t-tau, total tau.

**eTable 4.** Biomarker fold changes at each time point in the validation cohort

| Fold change     | 24h         |                           | 48h         |                           | 72h          |                            |
|-----------------|-------------|---------------------------|-------------|---------------------------|--------------|----------------------------|
|                 | Good        | Poor                      | Good        | Poor                      | Good         | Poor                       |
| p-tau           | 1.00(0.570) | 8.83(29.8) <sup>***</sup> | 1.02(0.655) | 1.88(2.62) <sup>***</sup> | 1.03(0.599)  | 1.27(0.836) <sup>***</sup> |
| NfL             | 1.00(1.68)  | 30.8(36.8) <sup>***</sup> | 1.57(2.86)  | 86.2(121) <sup>***</sup>  | 1.72(2.93)   | 78.8(110) <sup>***</sup>   |
| t-tau           | 1.00(5.80)  | 22.2(81.8) <sup>***</sup> | 0.455(1.20) | 67.7(166) <sup>***</sup>  | 0.293(0.580) | 57.6(170) <sup>***</sup>   |
| A $\beta$ 42    | 1.00(0.646) | 1.47(3.80) <sup>*</sup>   | 1.39(0.928) | 2.44(5.35) <sup>**</sup>  | 1.49(0.890)  | 2.53(4.69) <sup>**</sup>   |
| A $\beta$ 40    | 1.00(0.754) | 1.11(1.10)                | 1.34(1.00)  | 1.66(1.28) <sup>**</sup>  | 1.56(1.01)   | 1.95(1.45) <sup>**</sup>   |
| A $\beta$ 42/40 | 1.08(2.14)  | 2.02(4.38) <sup>**</sup>  | 0.894(1.31) | 1.44(4.42)                | 0.675(0.776) | 0.723(0.885)               |

Values given in mean (SD) fold change in relation to the “Good outcome” group at 24h.

\*  $P < 0.05$ ; \*\*  $P < 0.01$ ; \*\*\*  $P < 0.001$  in comparison to the good outcome group at the same time point.

*Abbreviations: A $\beta$ 42, amyloid- $\beta$  42; A $\beta$ 40, amyloid- $\beta$  40; A $\beta$ 42/40, amyloid- $\beta$  42/40; NfL, neurofilament light chain; p-tau181, tau phosphorylated at threonine 181; t-tau, total tau.*

**eTable 5.** Sensitivity analysis: serum p-tau, t-tau, NfL, A $\beta$ 40, A $\beta$ 42 and A $\beta$ 42/40 in cardiac arrest with good and poor outcome (validation cohort – complete cases)

|                                  | <b>Total AUROC<br/>(95% CI)</b> | <b>Good outcome</b> | <b>Poor outcome</b> | <b>P value</b> |
|----------------------------------|---------------------------------|---------------------|---------------------|----------------|
| <b>24 h after cardiac arrest</b> |                                 |                     |                     |                |
| <i>N</i>                         | -                               | 269                 | 241                 |                |
| Age, years (SD)                  | -                               | 60.1(12.2)          | 68.7(11.2)          | <0.001         |
| Sex, M (%)                       | -                               | 227 (84.4%)         | 182 (75.5%)         | 0.01           |
| p-tau                            | 0.96 (0.95–0.97)                | 6.14(3.52)          | 24.7(36.8)          | < 0.001        |
| A $\beta$ 40                     | 0.50 (0.45–0.55)                | 108(113)            | 106(148)            | Ns             |
| A $\beta$ 42                     | 0.49 (0.44–0.54)                | 5.57(4.29)          | 5.38(5.72)          | Ns             |
| A $\beta$ 42/40                  | 0.54 (0.49–0.59)                | 0.053(0.027)        | 0.058(0.048)        | 0.002          |
| NfL                              | 0.93 (0.91–0.95)                | 39.8(47.6)          | 1430(3080)          | < 0.001        |
| t-tau                            | 0.80 (0.76–0.84)                | 2.33(3.50)          | 11.3(39.7)          | < 0.001        |
| <b>48 h after cardiac arrest</b> |                                 |                     |                     |                |
| <i>N</i>                         | -                               | 259                 | 231                 |                |
| Age, years (SD)                  | -                               | 59.9(12.2)          | 68.3(11.1)          | <0.001         |
| Sex, M (%)                       | -                               | 219 (84.6%)         | 177 (76.6%)         | 0.03           |
| p-tau181                         | 0.69 (0.64–0.73)                | 5.70(3.83)          | 8.60(7.08)          | < 0.001        |
| A $\beta$ 40                     | 0.56 (0.51–0.61)                | 142(129)            | 172(167)            | Ns             |
| A $\beta$ 42                     | 0.56 (0.50–0.61)                | 7.57(5.81)          | 8.46(6.98)          | 0.01           |
| A $\beta$ 42/40                  | 0.51 (0.46–0.56)                | 0.056(0.023)        | 0.0543(0.027)       | Ns             |
| NfL                              | 0.93 (0.91–0.95)                | 47.6(64.3)          | 3280(6950)          | < 0.001        |
| tau                              | 0.89 (0.86–0.92)                | 1.85(2.13)          | 34.6(212)           | < 0.001        |
| <b>72 h after cardiac arrest</b> |                                 |                     |                     |                |
| <i>N</i>                         | -                               | 241                 | 203                 |                |
| Age, years (SD)                  | -                               | 59.6(12.3)          | 67.8(10.9)          | <0.001         |
| Sex, M (%)                       | -                               | 204 (84.6%)         | 154 (75.9%)         | 0.02           |
| p-tau181                         | 0.61 (0.55–0.66)                | 6.16(4.24)          | 7.18(5.34)          | < 0.001        |
| A $\beta$ 40                     | 0.59 (0.54–0.65)                | 166(133)            | 207(202)            | 0.01           |
| A $\beta$ 42                     | 0.60 (0.54–0.65)                | 8.16(4.67)          | 9.53(7.97)          | < 0.001        |
| A $\beta$ 42/40                  | 0.49 (0.43–0.54)                | 0.050(0.018)        | 0.050(0.018)        | Ns             |
| NfL                              | 0.93 (0.91–0.95)                | 54.5(86.1)          | 2980(6140)          | < 0.001        |
| tau                              | 0.89 (0.86–0.92)                | 1.49(1.61)          | 34.0(202)           | < 0.001        |

Biomarker values given in median pg/mL (IQR).

*Abbreviations: A $\beta$ 42, amyloid- $\beta$  42; A $\beta$ 40, amyloid- $\beta$  40; A $\beta$ 42/40, amyloid- $\beta$  42/40; AUROC, area under the receiver operating characteristic curve; CI, confidence interval; IQR, interquartile range; NfL, neurofilament light chain; p-tau181, tau phosphorylated at threonine 181; t-tau, total tau.*

**eTable 6.** Sensitivity analysis: summary statistics of the longitudinal analyses in the validation cohort on complete cases

| Characteristic        | p-tau  |                 |         | NfL   |              |         | t-tau  |                |         |
|-----------------------|--------|-----------------|---------|-------|--------------|---------|--------|----------------|---------|
|                       | Beta   | 95% CI          | P-value | Beta  | 95% CI       | P-value | Beta   | 95% CI         | P-value |
| Outcome (poor)        | 0.890  | 0.829, 0.951    | <0.0001 | 1.214 | 1.102, 1.326 | <0.0001 | 0.448  | 0.320, 0.583   | <0.0001 |
| time                  | 0.0001 | -0.0005, 0.0007 | 0.77    | 0.003 | 0.003, 0.004 | <0.0001 | -0.005 | -0.007, -0.004 | <0.0001 |
| Outcome (poor) * time | -0.011 | -0.012, -0.010  | <0.0001 | 0.005 | 0.003, 0.006 | <0.0001 | 0.015  | 0.013, 0.017   | <0.0001 |

| Characteristic        | A $\beta$ 40 |                |         | A $\beta$ 42 |               |         | A $\beta$ 42/40 |                 |         |
|-----------------------|--------------|----------------|---------|--------------|---------------|---------|-----------------|-----------------|---------|
|                       | Beta         | 95% CI         | P-value | Beta         | 95% CI        | P-value | Beta            | 95% CI          | P-value |
| Outcome (poor)        | -0.164       | -0.286, -0.041 | 0.008   | -0.045       | -0.123, 0.033 | 0.26    | 0.128           | 0.059, 0.197    | 0.0002  |
| time                  | 0.005        | 0.004, 0.006   | <0.0001 | 0.004        | 0.003, 0.004  | <0.0001 | -0.0008         | -0.001, 0.0000  | 0.055   |
| Outcome (poor) * time | 0.003        | 0.002, 0.005   | <0.0001 | 0.002        | 0.001, 0.003  | <0.0001 | -0.001          | -0.002, -0.0002 | 0.02    |

Abbreviations: A $\beta$ 42, amyloid- $\beta$  42; A $\beta$ 40, amyloid- $\beta$  40; A $\beta$ 42/40, amyloid- $\beta$  42/40; CI, confidence interval; NfL, neurofilament light chain; p-tau181, tau phosphorylated at threonine 181; t-tau, total tau.



**eTable 7.** Sensitivity analysis: biomarker fold changes at each time point in the validation cohort on complete cases

|                    | 24h         |               | 48h         |               | 72h          |                |
|--------------------|-------------|---------------|-------------|---------------|--------------|----------------|
| <b>Fold Change</b> | <b>Good</b> | <b>Poor</b>   | <b>Good</b> | <b>Poor</b>   | <b>Good</b>  | <b>Poor</b>    |
| p-tau              | 1.00(0.571) | 8.90(30.9)*** | 1.01(0.653) | 1.89(2.67)*** | 1.01(0.598)  | 1.26(0.846)*** |
| NfL                | 1.00(1.69)  | 28.0(34.2)*** | 1.58(2.88)  | 75.8(113)***  | 1.74(3.01)   | 69.0(106)***   |
| t-tau              | 1.00(5.99)  | 19.5(74.6)*** | 0.435(1.23) | 60.6(158)***  | 0.280(0.595) | 47.3(151)***   |
| A $\beta$ 42       | 1.00(0.644) | 1.46(3.80)    | 1.39(0.929) | 2.44(5.37)**  | 1.48(0.893)  | 2.54(4.72)***  |
| A $\beta$ 40       | 0.998(0.74) | 1.12(1.10)    | 1.35(1.00)  | 1.68(1.29)**  | 1.57(1.02)   | 2.06(1.46)***  |
| A $\beta$ 42/40    | 1.00(1.99)  | 1.86(4.06)**  | 0.830(1.22) | 1.34(4.11)    | 0.627(0.722) | 0.671(0.823)   |

Values given in mean (SD) fold change in relation to the “Good outcome” group at 24h.  
 \* $P < 0.05$ ; \*\* $P < 0.01$ ; \*\*\* $P < 0.001$  in comparison to the good outcome group at the same time point.

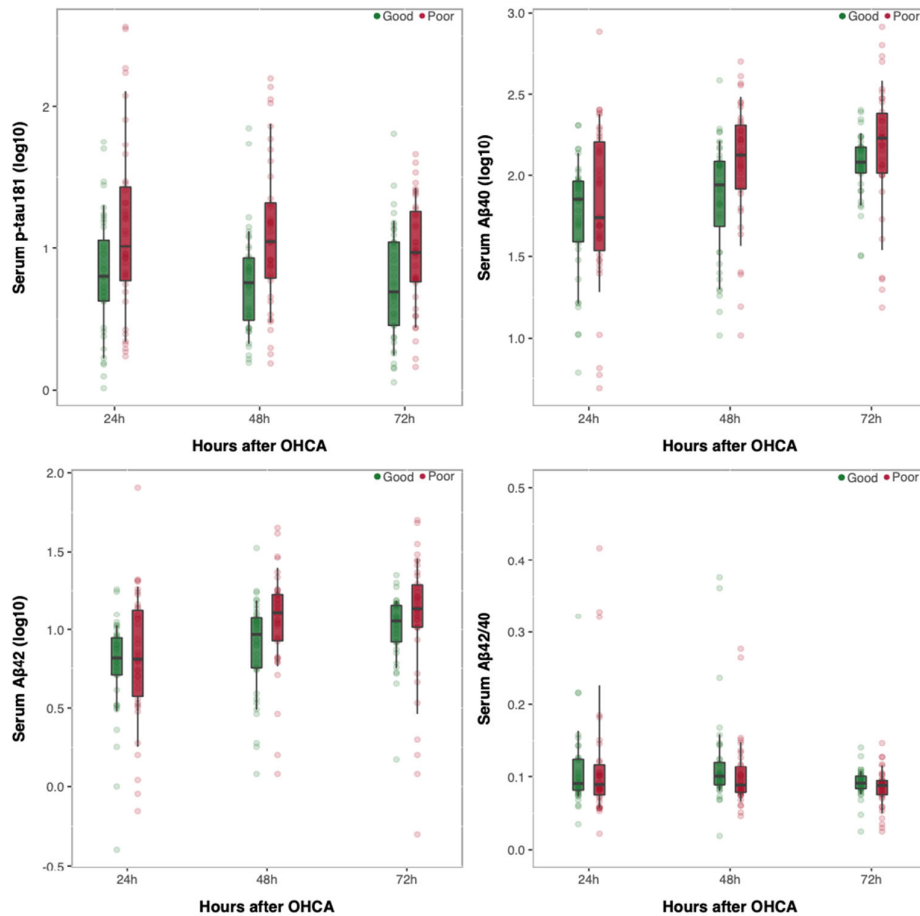

**eFigure 1. Cross-sectional biomarker concentrations in the discovery cohort.** Boxplots showing biomarkers levels across groups at each time point. The boxplots depict the median (horizontal bar), 25<sup>th</sup> to 75<sup>th</sup> percentiles (hinges) and whiskers indicate 10<sup>th</sup> and 90<sup>th</sup> percentiles. The diagnostic accuracy of neurological outcome at 24 h; p-tau (AUC=0.75, 95% CI, 0.64–0.88), Aβ42 (AUC=0.54 95% CI, 0.41–0.67), Aβ40 (AUC=0.54 95% CI, 0.40–0.67), Aβ42/40 (AUC=0.53, 95% CI, 0.40–0.56). The diagnostic accuracy of neurological outcome at 48 h; p-tau (AUC=0.69, 95% CI, 0.59–0.82), Aβ42 (AUC=0.68 95% CI, 0.56–0.80), Aβ40 (AUC=0.68 95% CI, 0.56–0.79), Aβ42/40 (AUC=0.62, 95% CI, 0.49–0.74). The diagnostic accuracy of neurological outcome at 72 h; p-tau (AUC=0.62, 95% CI, 0.51–0.74), Aβ42 (AUC=0.65 95% CI, 0.53–0.78), Aβ40 (AUC=0.65 95% CI, 0.52–0.77), Aβ42/40 (AUC=0.59, 95% CI, 0.46–0.71).

*Abbreviations: Aβ42, amyloid-β 42; Aβ40, amyloid-β 40; Aβ42/40, amyloid-β 42/40; AUC, area under the curve, OHCA, out-of-hospital cardiac arrest; p-tau181, tau phosphorylated at threonine 181.*

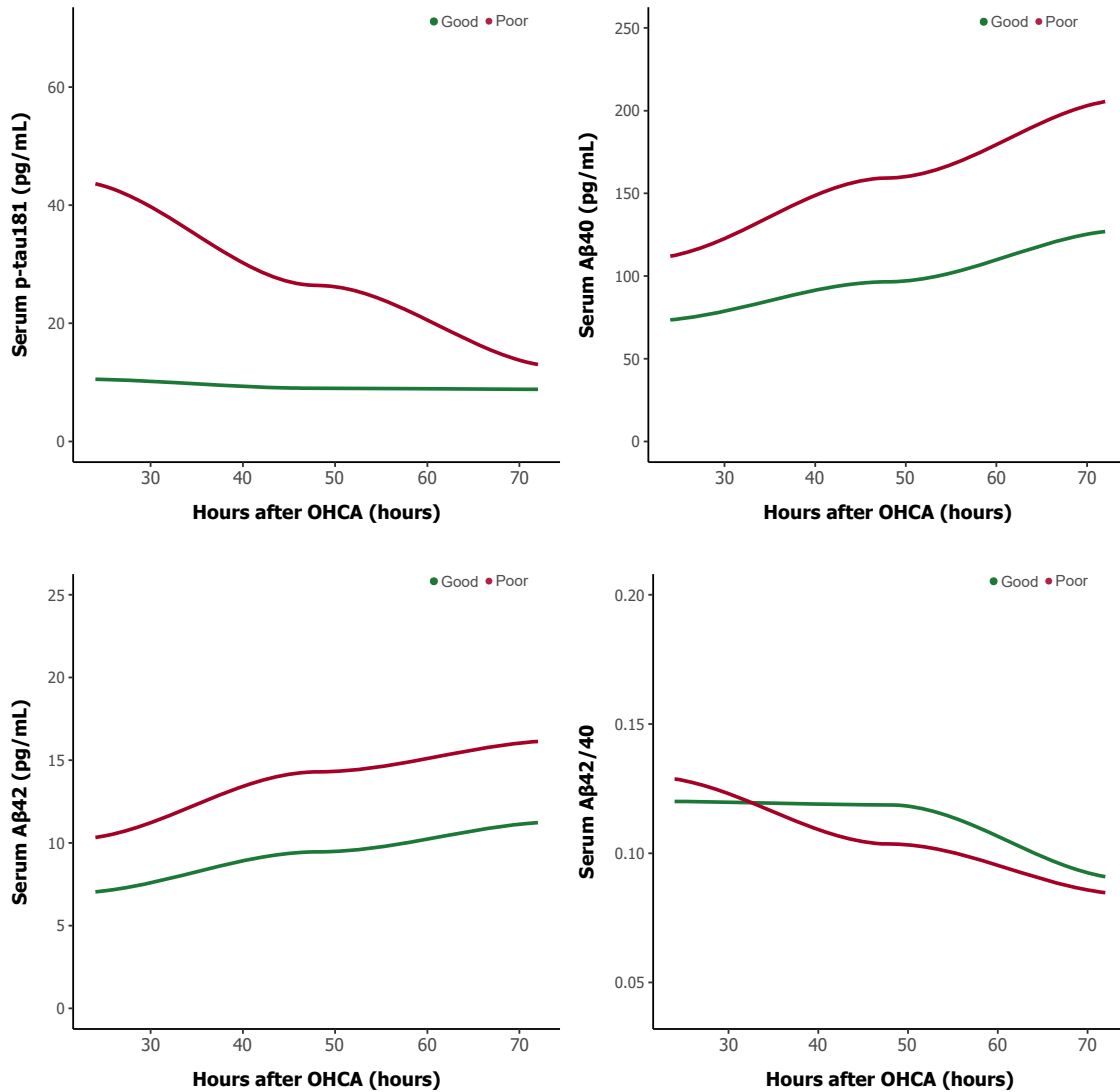

**Figure 2. Biomarker changes over time in the discovery cohort.** LOESS plots showing biomarkers trajectories over time: LMER analysis indicated that p-tau181 changes are similar across outcome groups, although the group with poor outcome has higher biomarker levels ( $P < 0.001$ ). The analysis also showed no difference of biomarker progression or overall levels between outcome groups for Aβ40, Aβ42 or Aβ42/40. The solid lines indicate the regression line and the 95% confidence intervals.

*Abbreviations: Aβ42, amyloid-β 42; Aβ40, amyloid-β 40; Aβ42/40, amyloid-β 42/40; OHCA, out-of-hospital cardiac arrest; p-tau181, tau phosphorylated at threonine 181.*

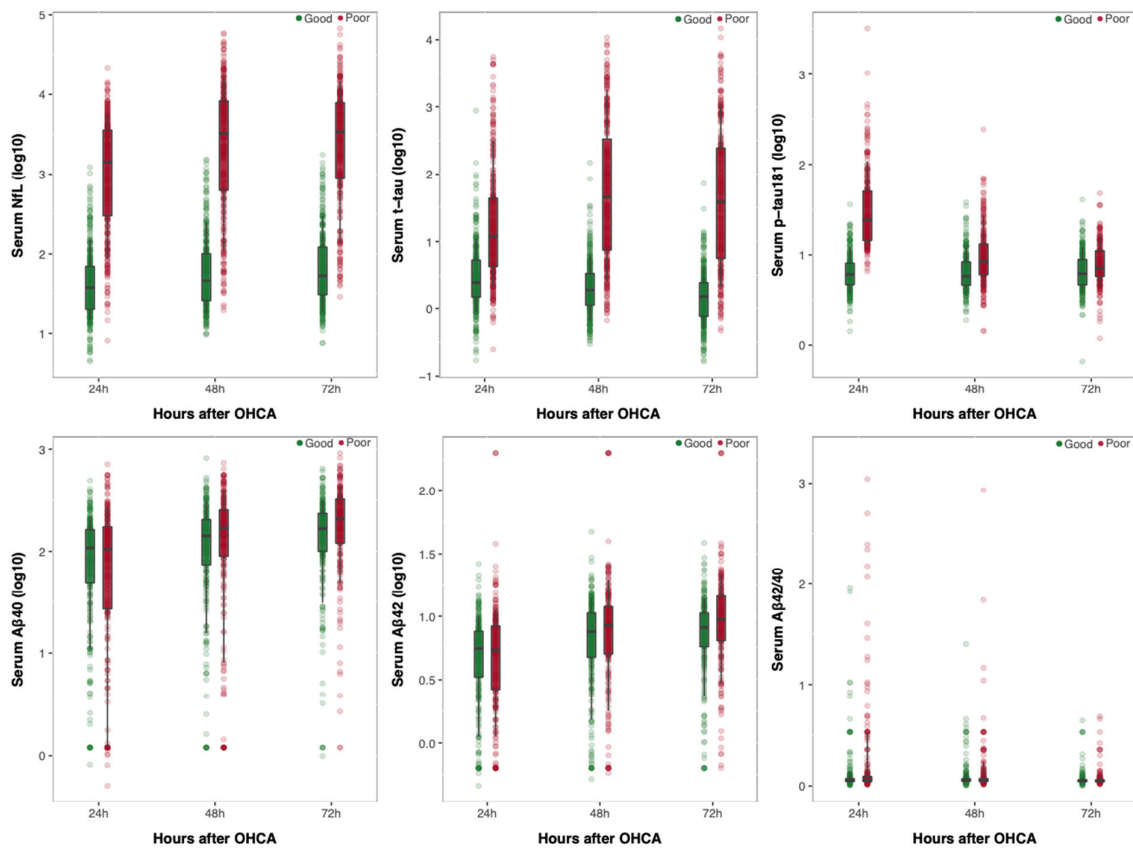

**Figure 3. Cross-sectional biomarker concentrations in the validation cohort.** Boxplots showing biomarkers levels across groups at each time point. The boxplots depict the median (horizontal bar), 25<sup>th</sup> to 75<sup>th</sup> percentiles (hinges) and whiskers indicate 10<sup>th</sup> and 90<sup>th</sup> percentiles.

*Abbreviations: Aβ42, amyloid-β 42; Aβ40, amyloid-β 40; Aβ42/40, amyloid-β 42/40; CI, confidence interval; NFL, neurofilament light chain; OHCA, out-of-hospital cardiac arrest; p-tau181, tau phosphorylated at threonine 181; t-tau, total tau.*

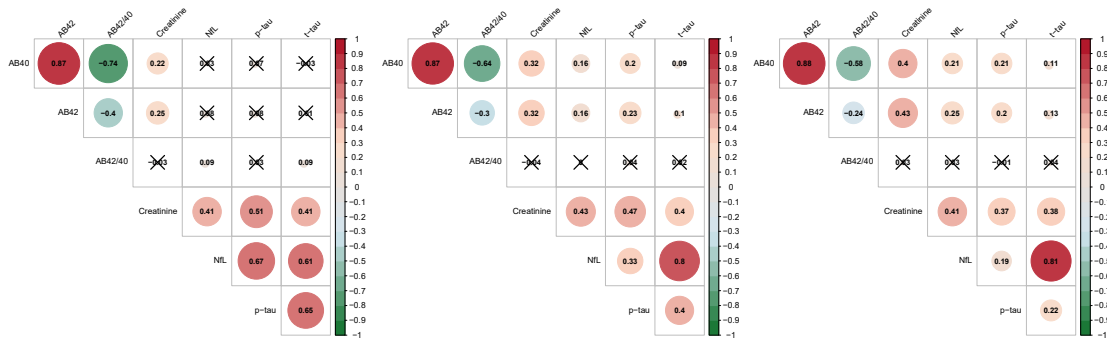

**Figure 4. Biomarker correlations in the validation cohort.** Matrices showing Spearman rank correlations between plasma biomarkers at 24 h (A), 48 h (B) and 72 h (C). The crosses indicate non-significant correlations ( $P > 0.05$ ).

*Abbreviations: A $\beta$ 42, amyloid- $\beta$  42; A $\beta$ 40, amyloid- $\beta$  40; A $\beta$ 42/40, amyloid- $\beta$  42/40; NFL, neurofilament light chain; p-tau181, tau phosphorylated at threonine 181; t-tau, total tau.*

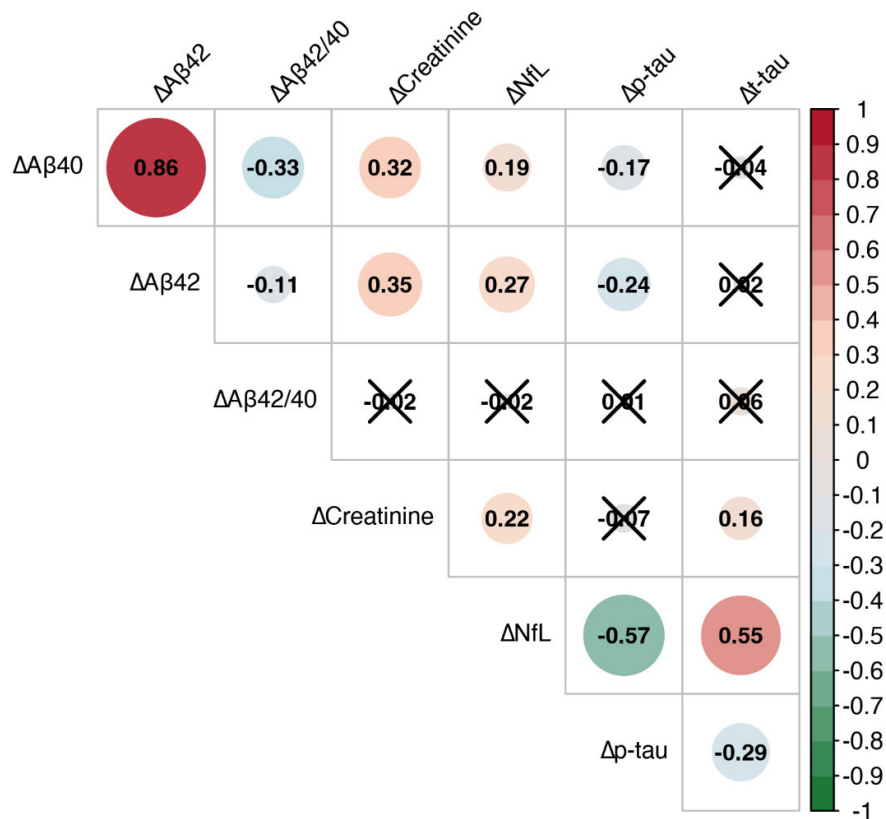

**eFigure 5. Biomarker change correlations in the validation cohort.** Matrices showing Spearman rank correlations between biomarker changes ( $\Delta = 72h - 24h$ ). The crosses indicate non-significant correlations ( $P > 0.05$ ).

*Abbreviations: A $\beta$ 42, amyloid- $\beta$  42; A $\beta$ 40, amyloid- $\beta$  40; A $\beta$ 42/40, amyloid- $\beta$  42/40; NfL, neurofilament light chain; p-tau181, tau phosphorylated at threonine 181; t-tau, total tau.*

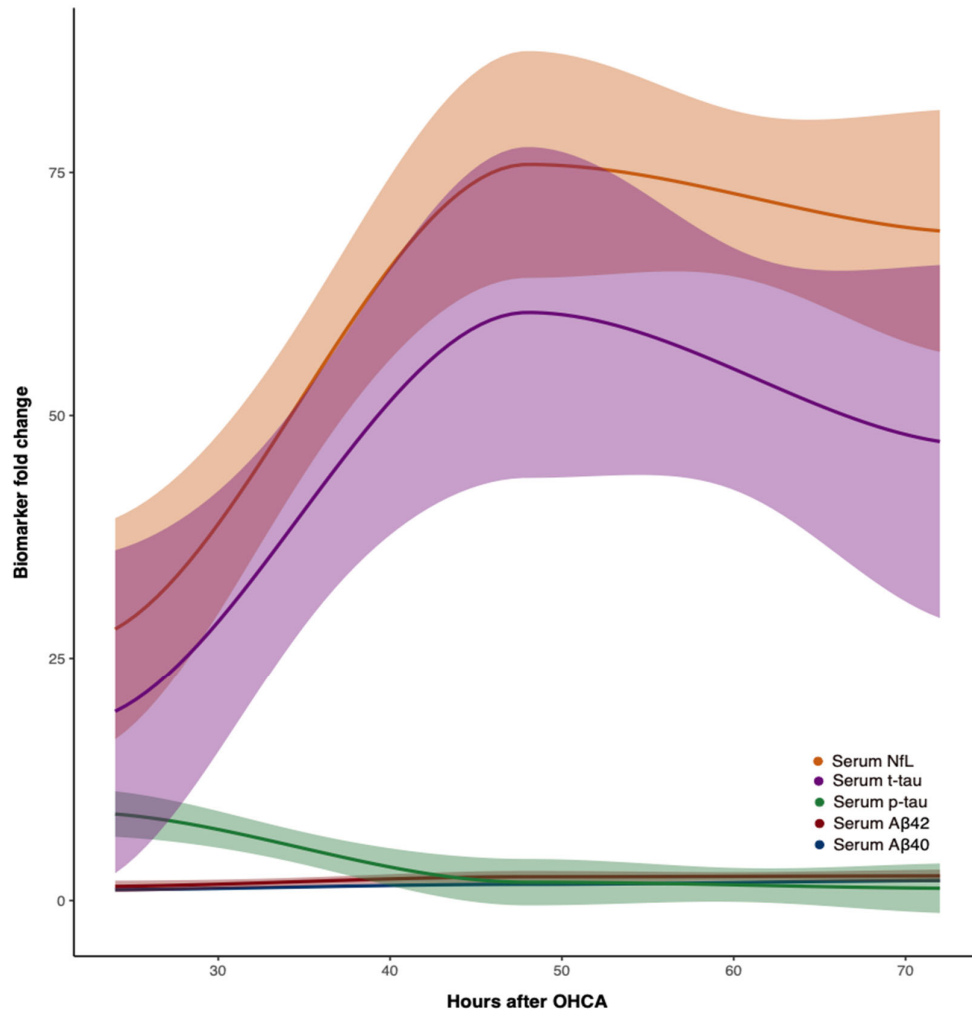

**eFigure 6. Sensitivity analysis: fold-changes of blood levels of p-tau, NfL, t-tau, Aβ40, Aβ42 and AB42/40.** Average biomarker fold changes over time in the “poor” outcome group plotted using the LOESS method in the complete cases of the validation cohort. Fold changes were calculated based on the average biomarker levels of the good outcome group (of this subset) at 24h. The solid lines indicate the regression line and the 95% confidence intervals.

*Abbreviations: Aβ42, amyloid-β 42; Aβ40, amyloid-β 40; Aβ42/40, amyloid-β 42/40; NfL, neurofilament light chain; OHCA, out-of-hospital cardiac arrest; p-tau181, tau phosphorylated at threonine 181; t-tau, total tau.*
