# Supplementary material for: Alzheimer Disease Blood Biomarkers in Patients With Out-of-Hospital Cardiac Arrest
Source: PubMed Central journal article supplement (PMC9989959; doi:10.1001/jamaneurol.2023.0050), 2023-03-06
Supplement: jamaneurol-e230050-s002.pdf [file jamaneurol-e230050-s002.pdf]

## **Data Sharing Statement**

Ashton. Alzheimer Disease Blood Biomarkers in Patients With Out-of-Hospital Cardiac Arrest. *JAMA Neurol.* Published March 06, 2023. doi:10.1001/jamaneurol.2023.0050

### **Data**

**Data available:** No
